# Supplementary material for: Ce3+ sensitized GdPO4:Tb3+ with iron oxide nanoparticles: a potential biphasic system for cancer theranostics
Source: Royal Society of Chemistry journal article supplement (doi:10.1039/c4dt00792a), 2014-01-01
Supplement: c4dt00792a1.pdf [file c4dt00792a1.pdf]

**Electronic Supplementary Information**

**Ce<sup>3+</sup> Sensitized GdPO<sub>4</sub>:Tb<sup>3+</sup> with Iron Oxide Nanoparticles: A Potential Biphasic  
System for Cancer Theranostics**

Niroj Kumar Sahu, Naorem Shanta Singh, Lina Pradhan, Dharendra Bahadur\*  
*Department of Metallurgical Engineering and Materials Science, Indian Institute of  
Technology Bombay, Mumbai-400 076, India*

*\*Email: dhiren@iitb.ac.in*

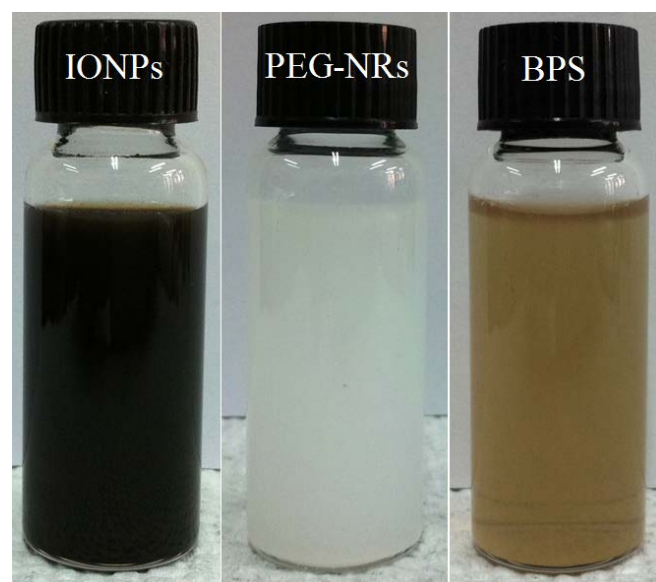

**Fig. S1** Visual photographs of individual water dispersed solutions of IONPs, PEG-NRs and BPS.

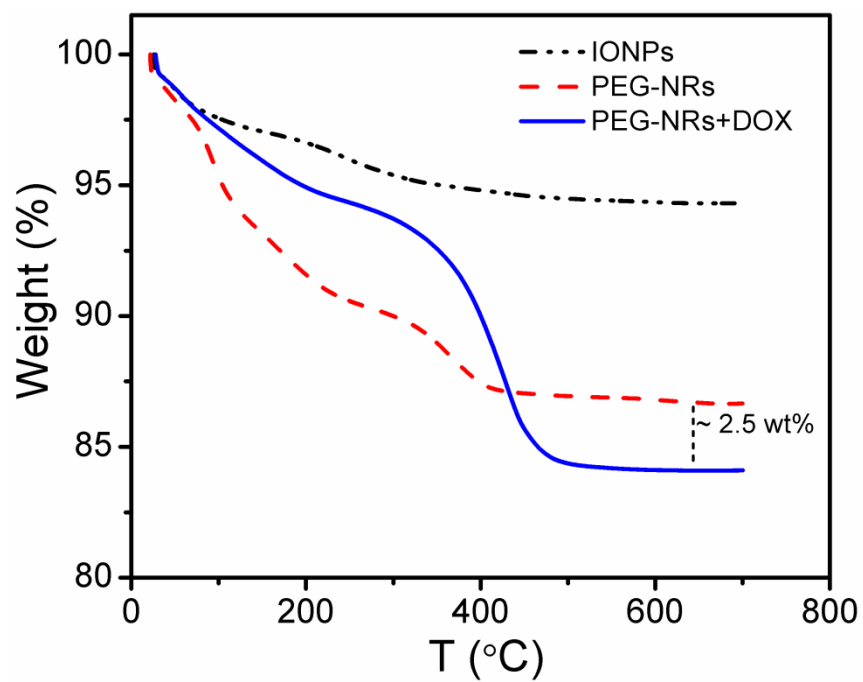

**Fig. S2** Weight loss profile of as-synthesized PEG-NRs, IONPs and PEG-NRs+DOX (as indicated in the legend of the graph) with heating. The TG curve was obtained in N<sub>2</sub> with a heating rate of 10 °C/min.

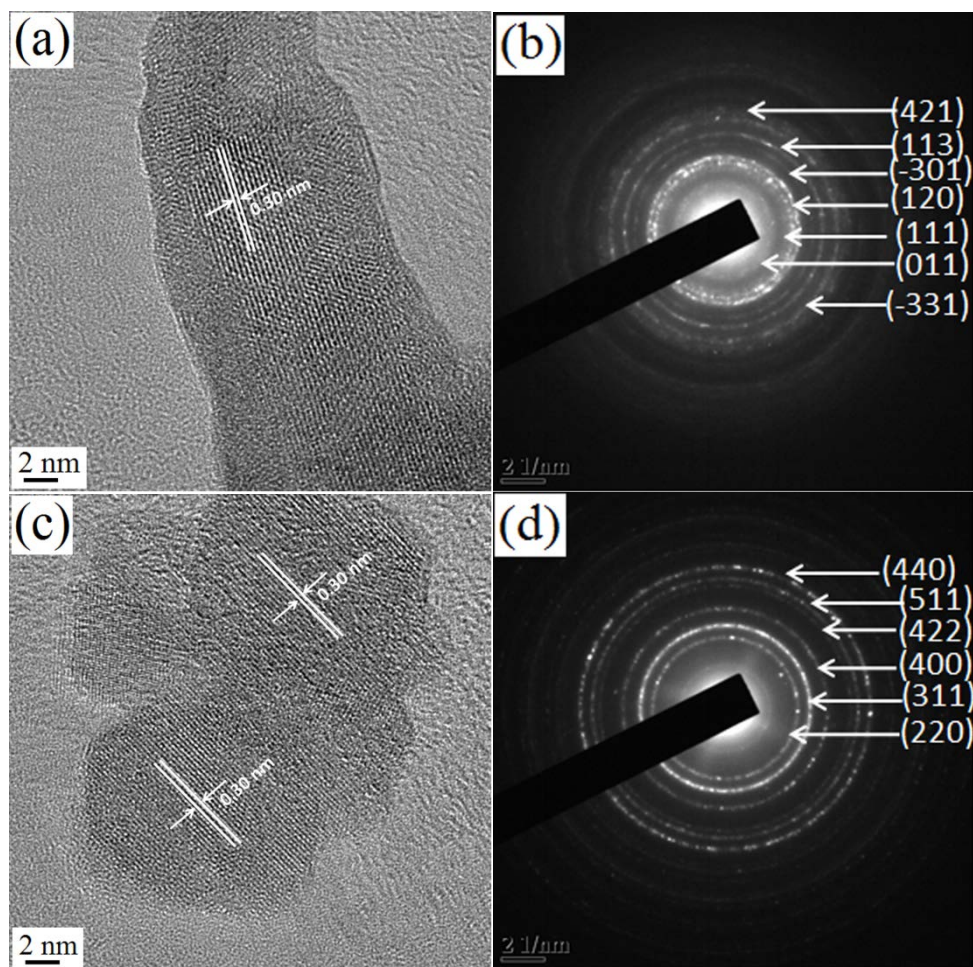

**Fig. S3** HRTEM images of (a) PEG-NRs and (c) IONPs are showing the inter-planar spacing and their respective SAED patterns (b and d) show the diffracted planes.

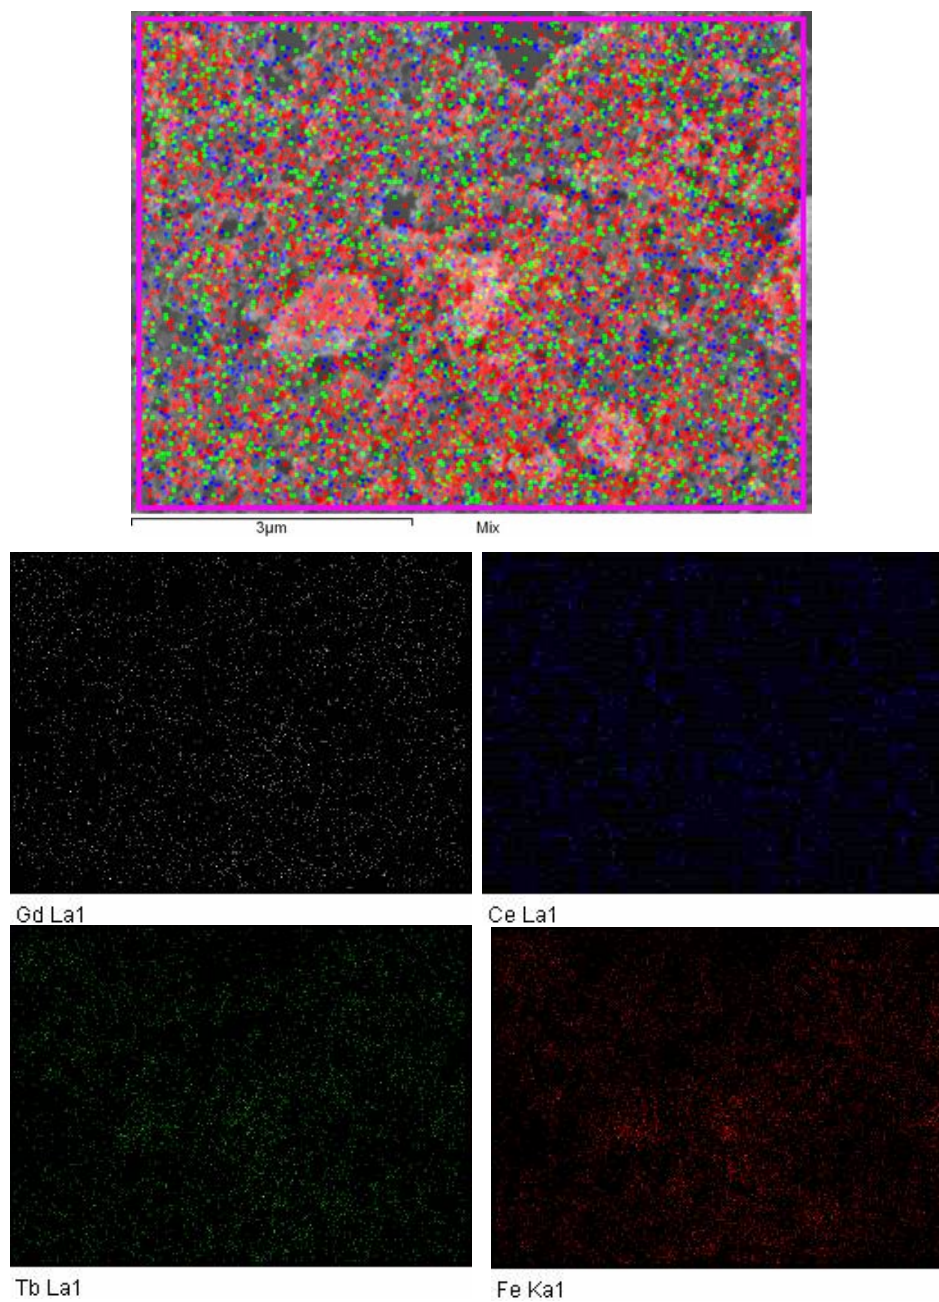

**Fig. S4** EDX mapping of the BPS showing the distribution of Gd, Ce, Tb and Fe in the sample.

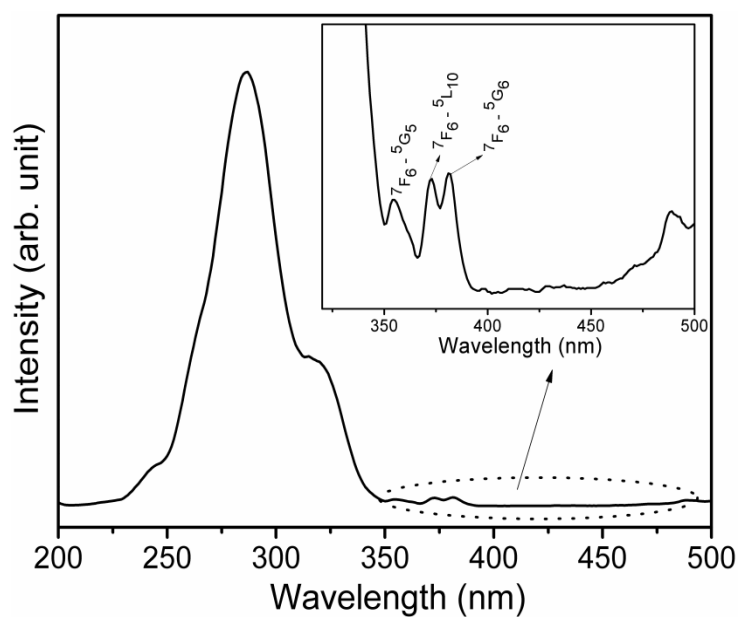

**Fig. S5** Excitation spectrum of PEG-NRs recorded with a monitoring emission at 544 nm. A part of the spectrum is magnified and is shown in the inset.

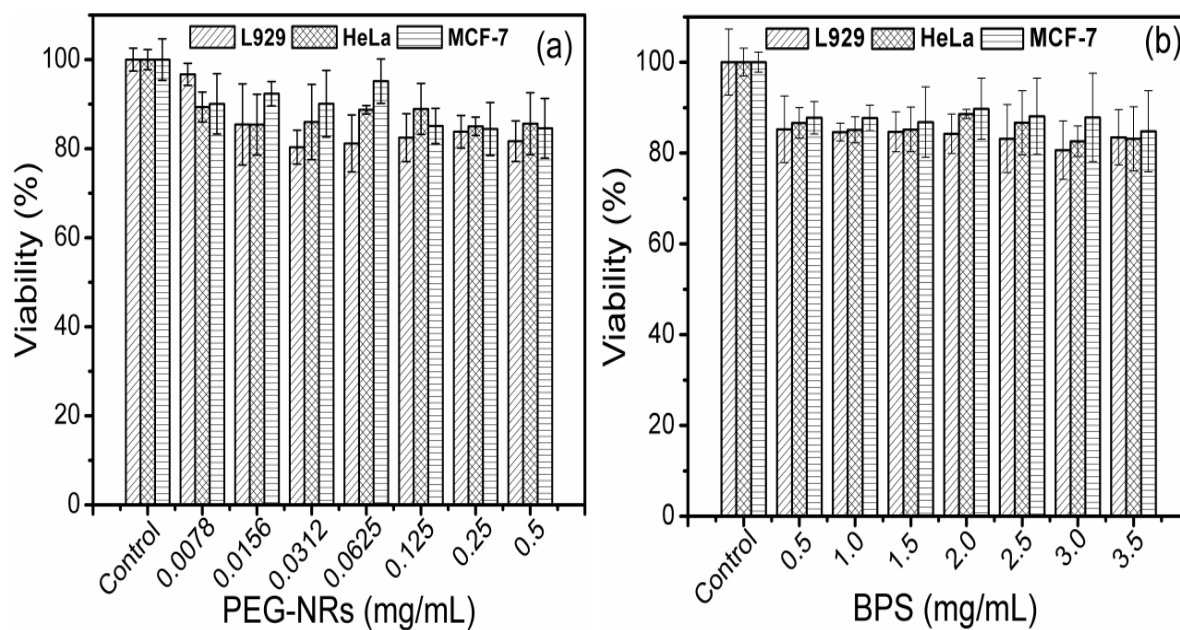

**Fig. S6** Viability of L929, HeLa and MCF-7 cells after incubation with different concentration of (a) PEG-NRs and (b) BPS for 24 h.

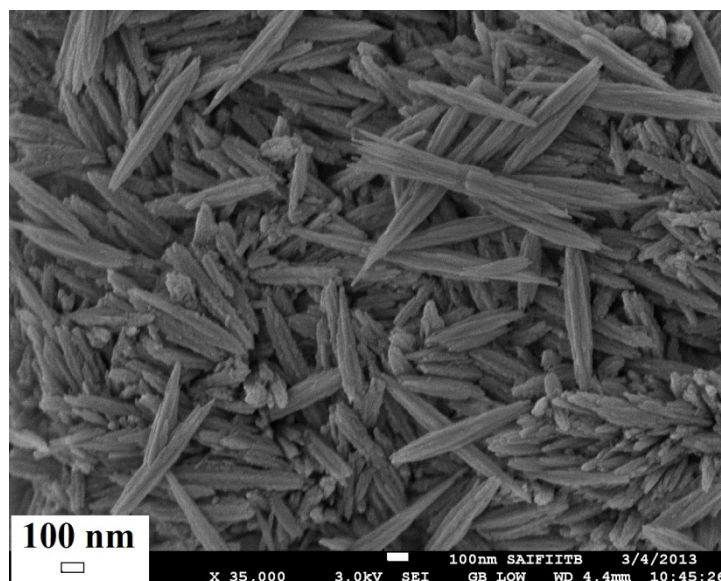

**Fig. S7** FESEM image of  $\text{GdPO}_4$  nanoparticles coated with PEG-3000.

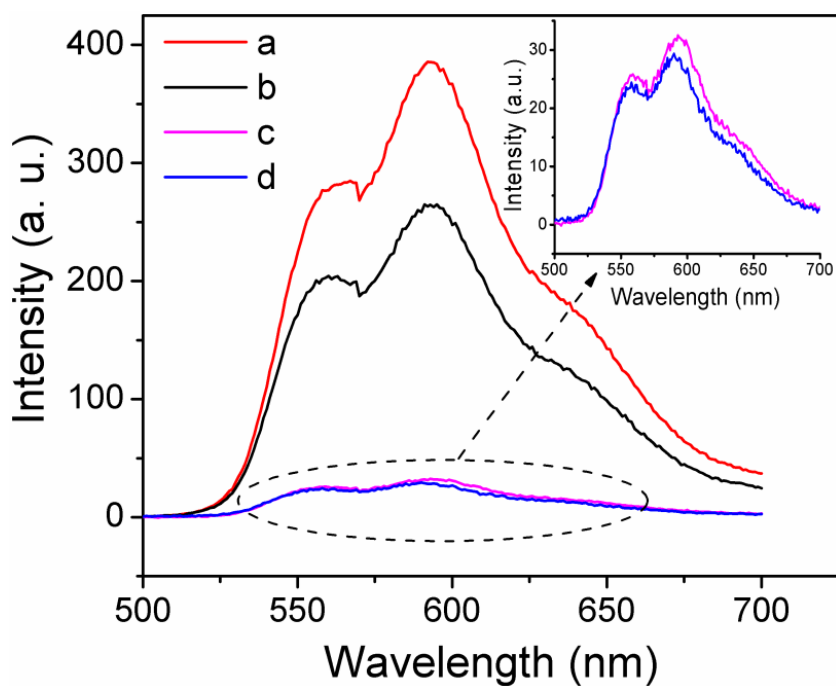

**Fig. S8** Fluorescence spectra of (a) DOX solution ( $50 \mu\text{g/mL}$ ) and the supernatants (unloaded part) after loading of DOX in (b) PEG-3000 coated  $\text{GdPO}_4$  nanoparticles, (c) PEG-NRs and (d) BPS.  $50 \mu\text{g}$  of DOX and  $10 \text{ mg}$  of the particles were incubated for 24 h in all cases. The excitation wavelength is  $470 \text{ nm}$  and the emission range is scanned between  $490$  and  $700 \text{ nm}$ . Inset is the magnified one of the encircled plots.

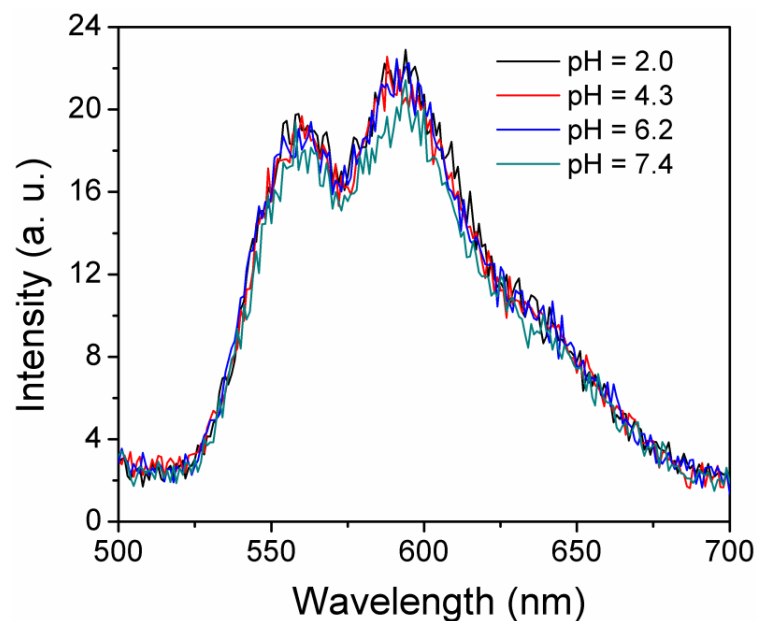

**Fig. S9** Fluorescence spectra of the 1 mL DOX solution (10 µg/mL) at different pH of 2.0, 4.3, 6.2 and 7.4.

To confirm whether there is any influence of pH on fluorescence intensity of DOX, we have recorded the fluorescence spectra of the 1 mL DOX solution (10 µg/mL) at different pH of 2, 4.3, 6.2 and 7.4. No significant variation in intensity was found (Fig. S9). Hence it indicates that the mechanism of drug loading and release is dependent on the change in the nature of the chemical bonding of the drug molecule with the functionalized nanoparticles in different pH environments.

**Table S1.** Zeta potentials and hydrodynamic diameter of PEG-NRs, IONPs and BPS.

| Sample  | Zeta potential (mV) | Hydrodynamic diameter ( $H_d$ , nm) |
|---------|---------------------|-------------------------------------|
| PEG-NRs | -26.9               | 100.7                               |
| IONPs   | -37.2               | 118.2                               |
| BPS     | -31.3               | 344.3                               |

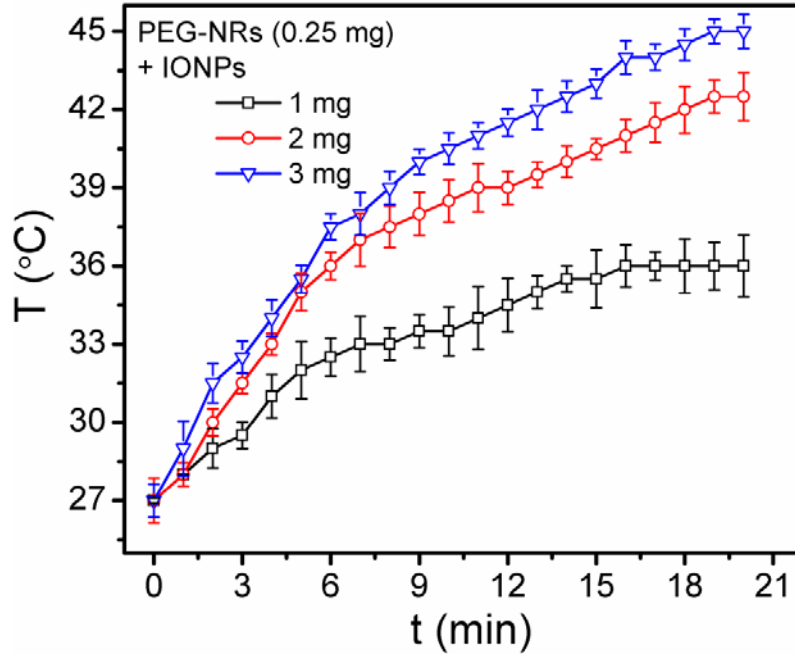

**Fig. S10** Temperature (T) versus time (t) plot for an aqueous suspension of biphasic mixture of IONPs with PEG-NRs under ACMF (250 kHz, 460 Oe).

Magnetic fluids (colloidal suspension of magnetic nanoparticles) under an AC magnetic field produce heat loss (power dissipation) by (i) hysteresis loss, (ii) Brownian rotational loss, (ii) Néel's spin relaxation and (iv) eddy current. The heat loss due to hysteresis is ruled out as the magnetic nanoparticles are superparamagnetic in nature and that due to eddy current is negligible as the resistivity of the magnetite NPs is very high ( $\rho \sim 10^2$  ohm-cm). So the major contribution of power dissipation (heat loss) comes from the Brownian motion and Néel's spin relaxation. The total heat/power dissipation (P) can be expressed as:

$$P = \mu_0 \pi \chi'' f H_0^2 \quad (1)$$

Where,  $\mu_0$  is the permeability of free space,  $f = \omega/2\pi$  is the frequency of the AC magnetic field and  $\chi''$  is the imaginary part of the magnetic susceptibility ( $\chi = \chi' + \chi'' = M/H$ )

$$\chi'' = \frac{\omega\tau}{1+(\omega\tau)^2} \chi \quad (2)$$



Where  $\tau$  is the total relaxation contributed from Brownian rotational and Néel's spin relaxations. In Brownian rotational relaxation ( $\tau_B$ ), the magnetic moment aligns with the magnetic field (H) and the particle rotates under an AC field. Brownian relaxation at a particular temperature (T) is given by:

$$\tau_B = \frac{4\pi\eta r_h^3}{k_B T}, \quad (3)$$

Where,  $\eta$  is the dynamic viscosity of carrier liquid and  $r_h$  is the hydrodynamic radius of the magnetic nanoparticles. During rotation, collision with the surrounding medium generates heat. The Néel's spin rotational relaxation ( $\tau_N$ ) is due to the rotation of magnetic spin of a domain from 0 to 180° which is given by the equation,

$$\tau_N = \tau_0 e^{\frac{K_u V}{k_B T}} \quad (4)$$

where,  $K_u V$  ( $K_u$  = anisotropy constant,  $V$  = particle volume) is the effective anisotropy energy and the  $k_B T$  ( $k_B$  = Boltzmann's constant) is the thermal energy at temperature T.

The total relaxation (s) is expressed as,

$$\tau^{-1} = \tau_N^{-1} + \tau_B^{-1} \quad (5)$$

The heating ability of the water-stable NC suspension was measured from the time-dependent calorimetric measurements using instrument (EASY HEAT, EZLI5060) with 6 cm diameter (4 turns) coil. To maintain the temperature of the coil at ambient temperature, a cooled water circulation surrounding to the coils is provided. During the experiment, 1 mL of water suspended NC (1, 2 and 3 mg/ml of Fe<sub>3</sub>O<sub>4</sub> along with 0.25 g of PEG-NRs) was taken in a plastic micro centrifuge tube (2 ml) and placed at the center of the coil to minimize the heat loss. The applied frequency was 250 kHz. Samples were kept under varying AC magnetic field (by varying the current,  $i$ ) to reach the desired hyperthermia temperature. For the conducted experiments, the magnetic field was calculated from the relationship:

$$H = \frac{1.257ni}{L} \text{ Oe} \quad (6)$$

Where,  $n$ ,  $i$  and  $L$  denote the number of turns, applied current and the diameter of the turn in centimeters, respectively. Temperature was measured using an alcohol thermometer with an accuracy of  $\pm 0.5$  °C.

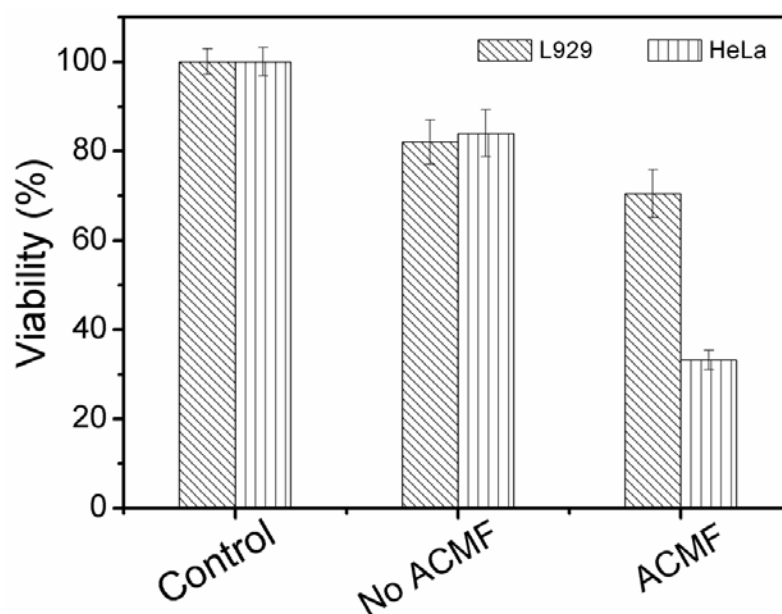

**Fig. S11** Cell viabilities (%) of L929 and HeLa cells after incubation with BPS (2 mg IONPs + 0.25 mg PEG-NRs) with or without the exposure of ACMF.

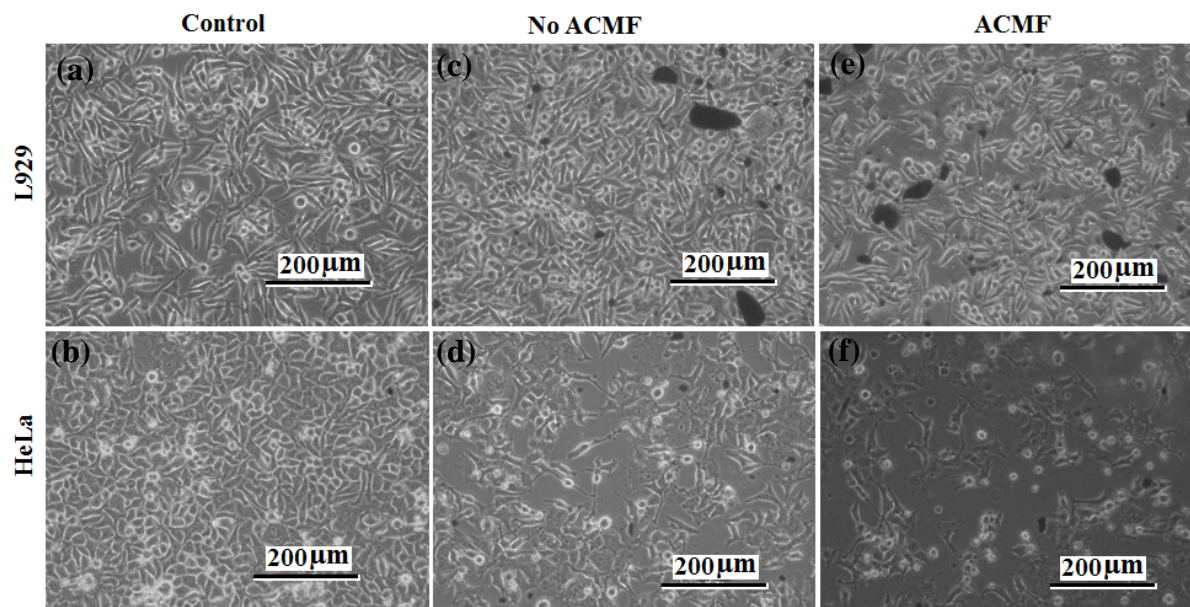

**Fig. S12** Microscopic images of L929 and HeLa cells: (a& b) control, (c & d) after treatment with biphasic mixture of IONPs (2 mg) and PEG-NRs (0.25 mg) in absence of ACMF and (e & f) in presence of ACMF. All scale bars are of 200 μm.
